# Supplementary material for: A siramesine-loaded metal organic framework nanoplatform for overcoming multidrug resistance with efficient cancer cell targeting
Source: Royal Society of Chemistry journal article supplement (doi:10.1039/c9ra09923a), 2020-01-01
Supplement: c9ra09923a1.pdf [file c9ra09923a1.pdf]

Electronic supplementary information (ESI)

# **Siramesine-loaded Metal Organic Framework Nanoplatfom for Overcoming Multidrug Resistance with Efficient Cancer Cell Targeting**

Jiahui Liu <sup>1</sup>, Menghuan Tang <sup>1</sup>, Yanghao Zhou <sup>2</sup>, Yijuan Long <sup>1</sup>, Yuan Cheng <sup>2</sup>, Huzhi Zheng <sup>1\*</sup>

<sup>1</sup> Key Laboratory of Luminescent and Real-Time Analytical Chemistry (Southwest University),  
Ministry of Education, College of Chemistry and Chemical Engineering, Southwest University,  
Chongqing, 400715, P. R. China.

<sup>2</sup> Department of Neurosurgery, the Second Affiliated Hospital of Chongqing Medical University,  
Chongqing, 400010, P. R. China

\*Corresponding author; E-mail: [zhenghz@swu.edu.cn](mailto:zhenghz@swu.edu.cn) (H. Zheng).

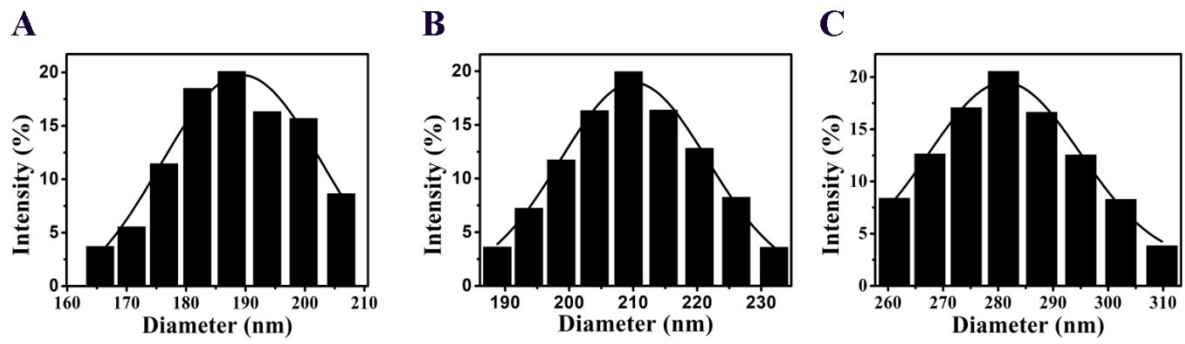

**Figure S1.** DLS analysis of ZIF-8, ZIF-8@Sira and ZIF-8@Sira/FA.

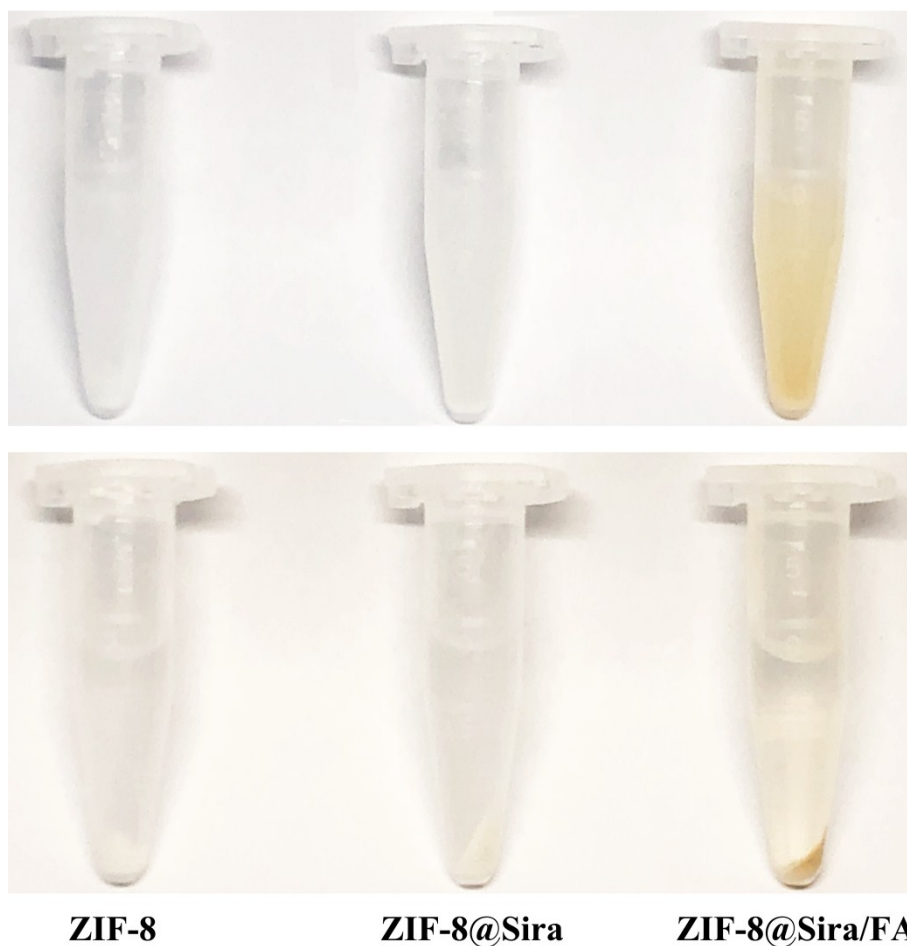

**Figure S2.** Photographic images of ZIF-8, ZIF-8@Sira and ZIF-8@Sira/FA aqueous solution before (top) and after (bottom) centrifugation.

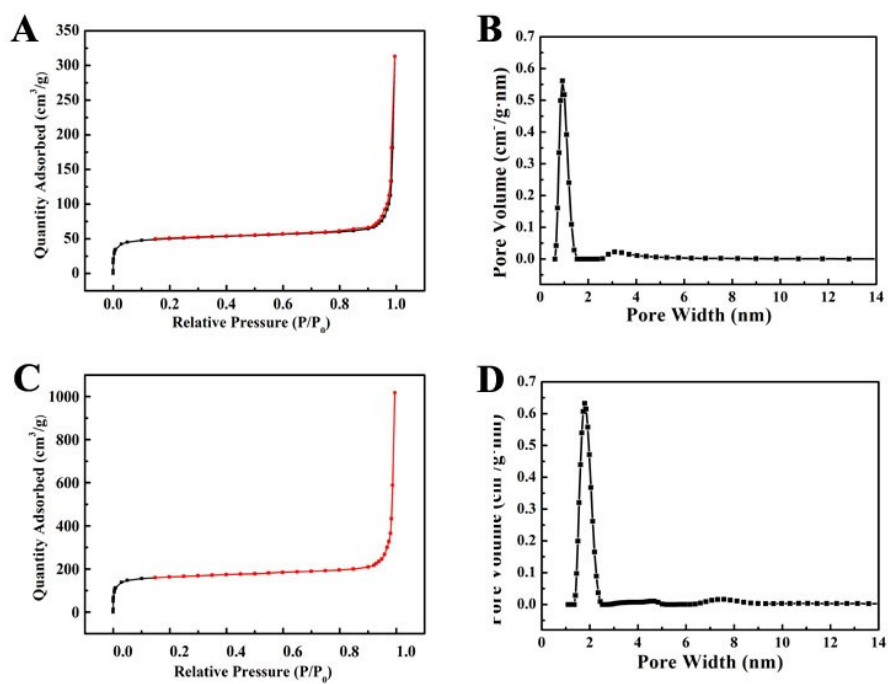

**Figure S3.** Nitrogen adsorption-desorption isotherms of ZIF-8 (A) and ZIF-8@Sira (C) and the pore size distribution of ZIF-8 (B) and ZIF-8@Sira (D).

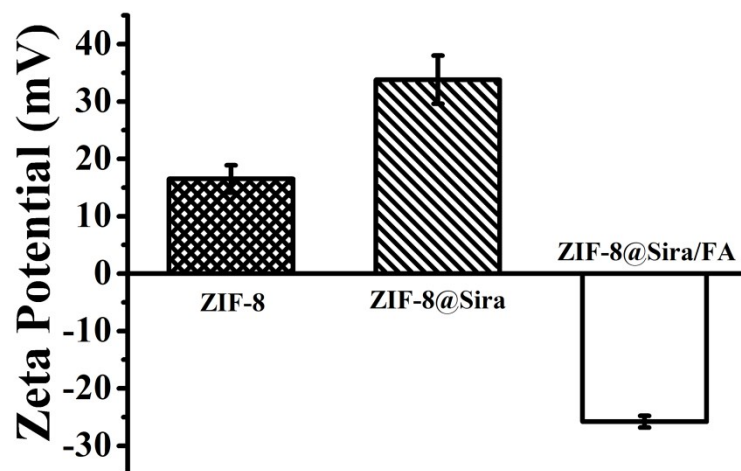

**Figure S4.** Zeta potentials of ZIF-8, ZIF-8@Sira and ZIF-8@Sira/FA, bars represent mean  $\pm$  standard deviation (n = 3).

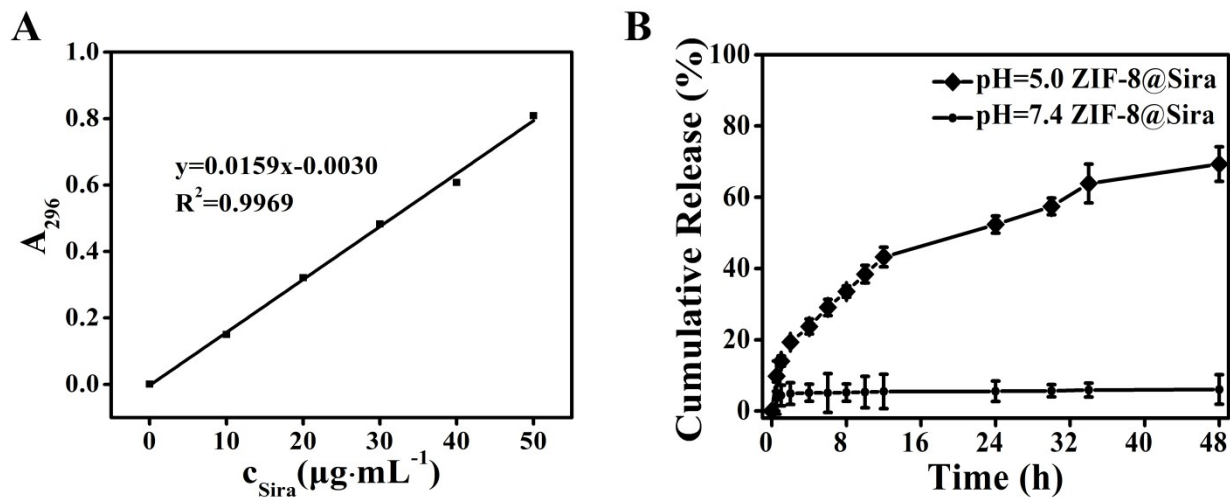

**Figure S5. Drug release assay in vitro.** (A) Linear calibration plots for siramesine detection; (B) The release curves of siramesine from ZIF-8@Sira in different PBS of pH 7.4 and pH 5.0 at 37 °C.

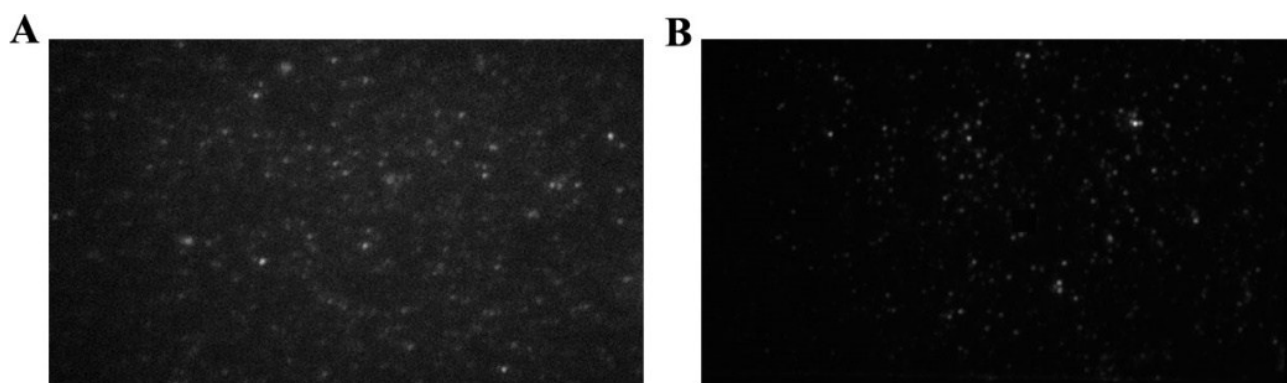

**Figure S6.** Single molecule fluorescence imaging of PFG-F (A) and ZIF-8/F (B).

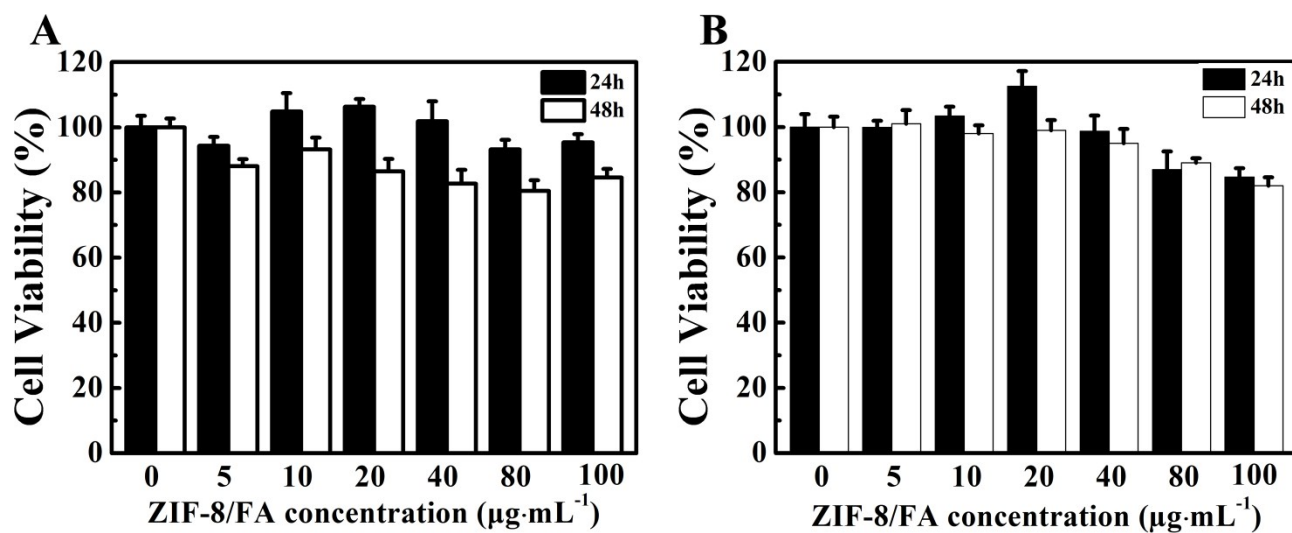

**Figure S7.** Cell viability of MCF-7 cells (A) and MCF-7/ADR cells (B) after incubating with ZIF-8/FA at different concentrations for 24 h and 48 h, the data are represent as the mean  $\pm$  SD (n = 6).



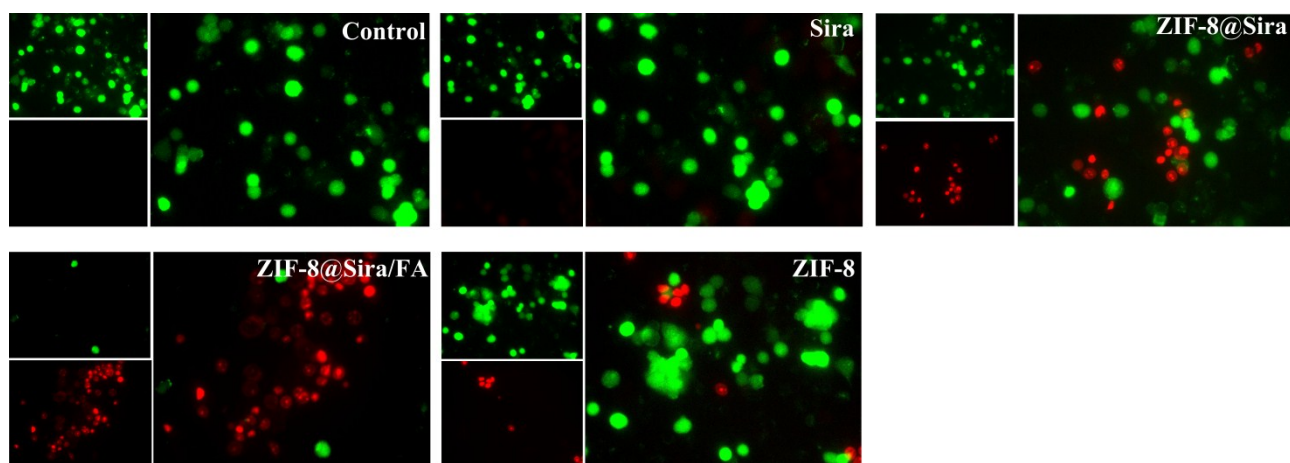

**Figure S8.** Confocal fluorescence images of drug delivery system incubated MCF-7 cells for 2 h. Live/dead stain shows dead cells as red and viable cells as green.

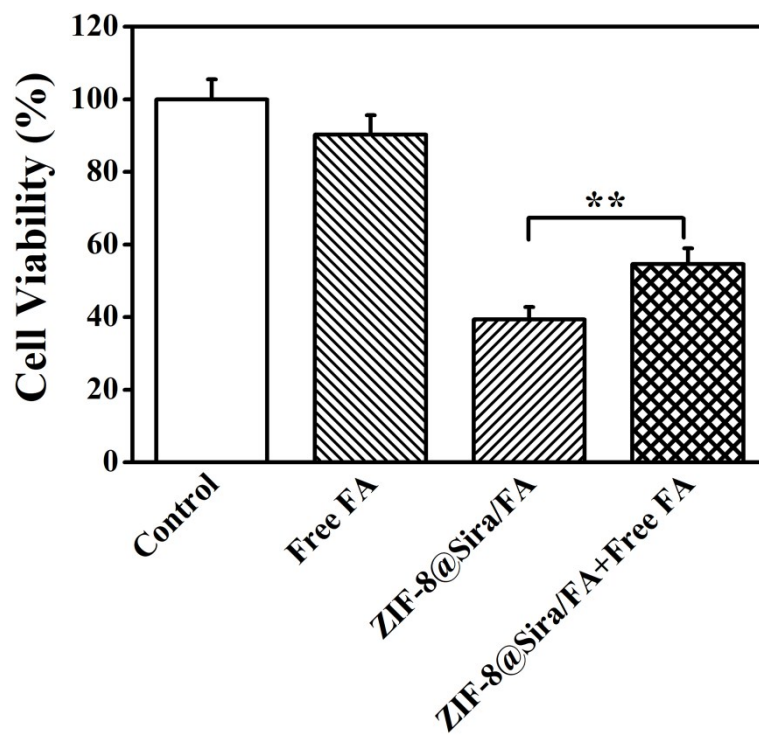

**Figure S9.** Cytotoxicity of ZIF-8@Sira/FA ( $2 \mu\text{g}\cdot\text{mL}^{-1}$ ) against MCF-7/ADR cells with free FA ( $5 \mu\text{g}\cdot\text{mL}^{-1}$ ) in 24 h. **\*\*** $p < 0.01$  when compared with ZIF-8@Sira/FA group. Data are represented as mean  $\pm$  SD ( $n = 3$ ).

**Table S1.** The data obtained from TEM and DLS of NPs.

|                      | <b>Diameter (nm)</b> | <b>DLS size (nm)</b> | <b>PDI</b> |
|----------------------|----------------------|----------------------|------------|
| <b>ZIF-8</b>         | 157 ± 6.8 (n = 100 ) | 188 ± 6.1 (n = 3)    | 0.37       |
| <b>ZIF-8@Sira</b>    | 168 ± 7.4 (n = 100 ) | 209 ± 5.8 (n = 3)    | 0.42       |
| <b>ZIF-8@Sira/FA</b> | 193 ± 6.3 (n = 100 ) | 281 ± 5.5 (n = 3)    | 0.26       |

**Table S2.** Analysis data of single molecule fluorescence imaging by Image-J.

|                     | <b>Fluorescence intensity</b> | <b>Particle number</b> | <b>MFI</b> |
|---------------------|-------------------------------|------------------------|------------|
| <b>PEG-F</b>        | 207.16                        | 2360                   | 0.09       |
| <b>ZIF-8@Sira/F</b> | 215.84                        | 862                    | 0.25       |

**Table S3.** IC<sub>50</sub> values for MCF-7 cells, MCF-7/ADR cells, and MCF-7/10A cells treated with ZIF-8 nanoparticles for 24 h and 48 h (n=3).

| <b>IC<sub>50</sub> (μg·mL<sup>-1</sup>) — 24 h</b> | <b>MCF-7</b> | <b>MCF-7/ADR</b> | <b>MCF-10A</b> |
|----------------------------------------------------|--------------|------------------|----------------|
| <b>Sira</b>                                        | 2.72         | 8.64             | 7.46           |
| <b>ZIF-8@Sira</b>                                  | 2.10         | 2.95             | 1.92           |
| <b>ZIF-8@Sira/FA</b>                               | 1.56         | 2.27             | 2.60           |

  

| <b>IC<sub>50</sub> (μg·mL<sup>-1</sup>) — 48 h</b> | <b>MCF-7</b> | <b>MCF-7/ADR</b> | <b>MCF-10A</b> |
|----------------------------------------------------|--------------|------------------|----------------|
| <b>Sira</b>                                        | 3.32         | 8.57             | 5.97           |
| <b>ZIF-8@Sira</b>                                  | 1.09         | 2.70             | 1.24           |
| <b>ZIF-8@Sira/FA</b>                               | 0.54         | 1.46             | 2.28           |
